# Supplementary material for: A cubic luminescent graphene oxide functionalized Zn-based metal-organic framework composite for fast and highly selective detection of Cu2+ions in aqueous solution
Source: Royal Society of Chemistry journal article supplement (doi:10.1039/c3an01943h), 2013-11-19
Supplement: c3an01943h.pdf [file c3an01943h.pdf]

# Electronic Supplementary Information

## **A Cubic Luminescent Graphene Oxide Functionalized Zn-based Metal-Organic Framework Composite for Fast and Highly Selective Detection of Cu<sup>2+</sup> Ions in Aqueous Solution**

Liyang Hao, Hongjie Song, Yingying Su and Yi Lv\*

Key Laboratory of Green Chemistry & Technology, Ministry of Education, College of  
Chemistry, Sichuan University, Chengdu, Sichuan 610064, China

Email: [lvyy@scu.edu.cn](mailto:lvyy@scu.edu.cn) (Y. Lv)

Tel. & Fax. +86-28-8541-2798

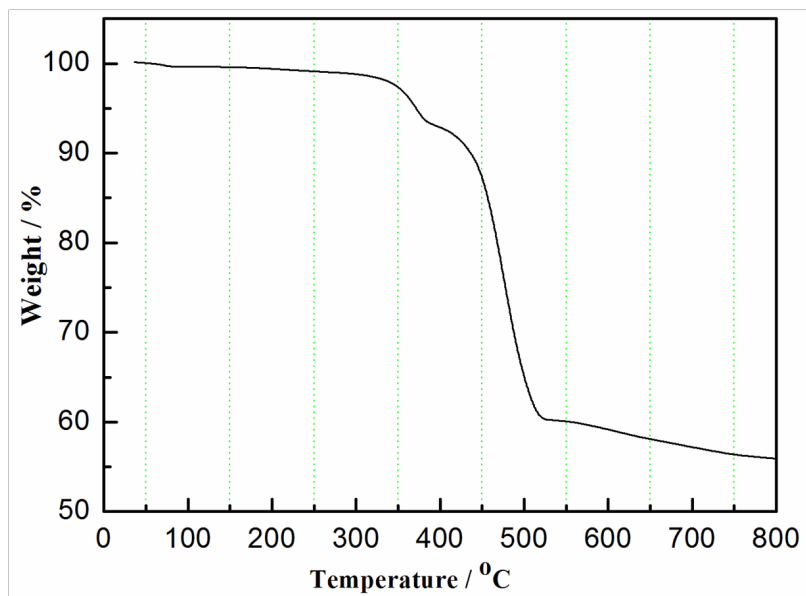

Fig. S1. TGA curve of the prepared ZnMGO composite.

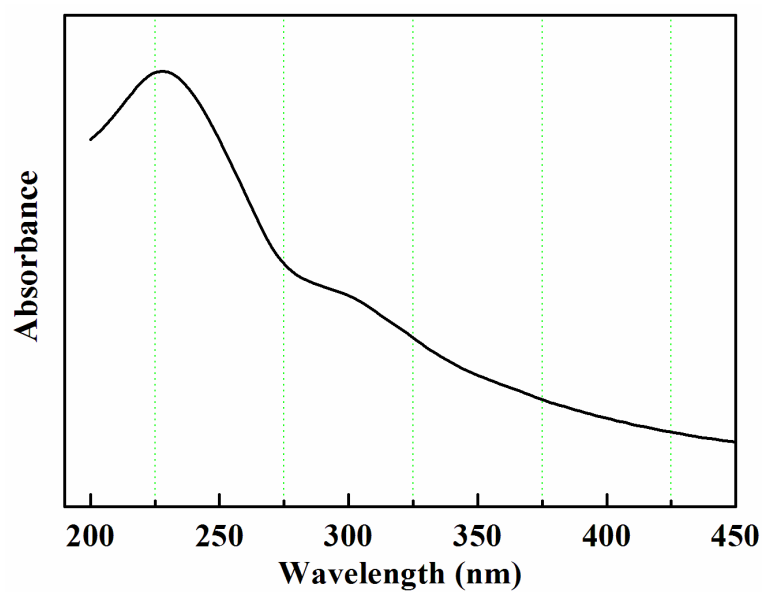

Fig. S2. UV-Vis spectrum of GO solution.

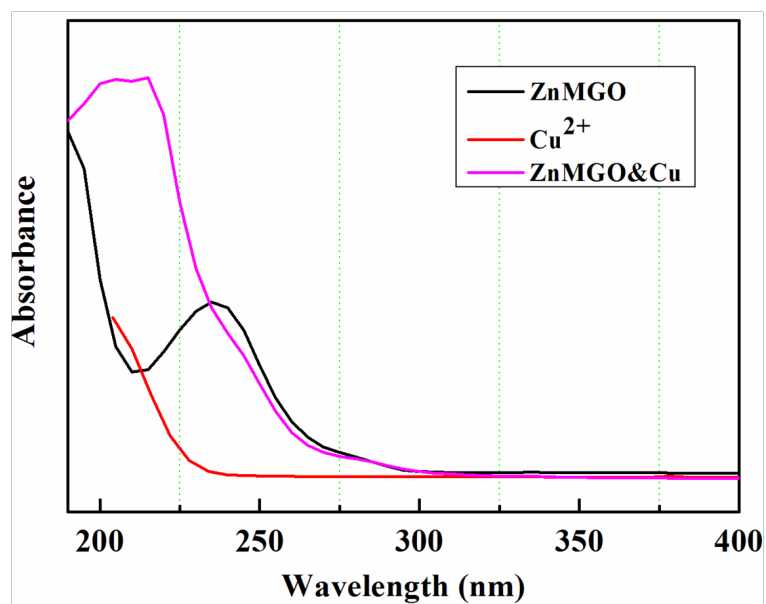

**Fig. S3.** UV-Vis spectrum of the ZnMGO composite (black line), ZnMGO&Cu (magenta line), and Cu<sup>2+</sup> (red line).

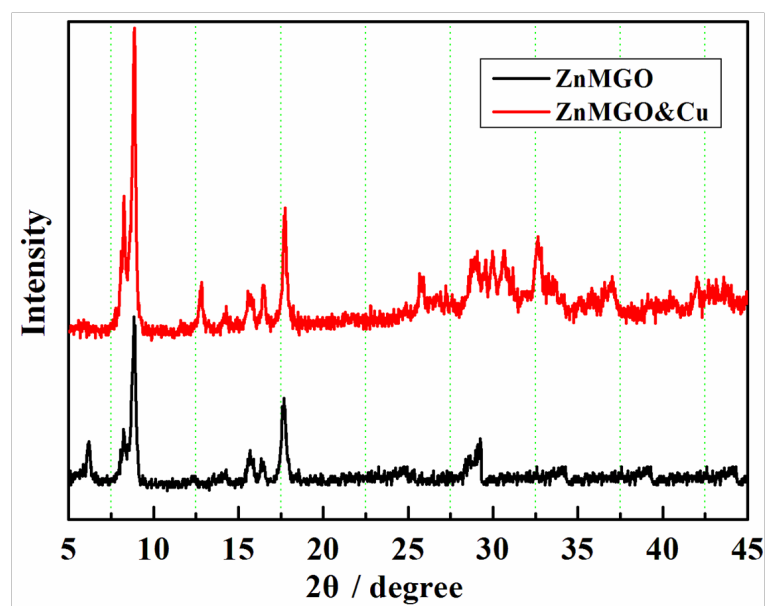

**Fig. S4.** XRD patterns for the ZnMGO composite (black line), and ZnMGO&Cu (red line).
